# Supplementary material
Source: publisher figshare collection journal article supplement (https://tandf.figshare.com/ndownloader/files/24713593)
Supplement: Supplementary file 1 [file 24713593]

>Tetrahymena_7

ATGAGCACAAATAAAAGAAAGCAACTCTACAAGATTATCATCTTAGGTGATTCTGGTGTAGGAAAGACTTCTCTTATGAA

CCAGTACGTCAACTAGCGTTTTACTCAACAATATAGAGCTACAGTTGGTGCTGATTTCATGGCTAAGGAAGTCACTATTG

ATGATCGTATGGTTACATTACAAATTTGGGATACCGCTGGTCAAGAACGTTTCTAATCCCTCGGTGGTGCTTTCTATAGA

GGTGCTGACTGCTGTGTTTTGGTCTATGATATTACAAATAAGAAGACCTTTGAAAACTTAGAAAGTTGGAAAGAAGAATT

TAAGCAACAAGGTTGCCCTAAAGATCCTGACACTTTCCCATTTGTTGTTATTGGAAATAAAAGCGATAAAGCATCAGAAA

GAAAAGTT---GAAACTGAGTTTGCTCAATAATGGTGCAAATCTAATGGAGACATTAAGCACTTCGAAACATCTGCCAAG

GATGATACTAATGTTAATGCTGCTTTTATGGCTATTGCTAAGGCTGCCTCCTCTTAATTCTAAGAAGATGCCATCTT---

---CTTCCCACCAAAGCCTGTTGTTTTGTAAACTGA-TAAGGCCAAAAAGAAAGAA--AAAA------AGGATGACTGCC

CTTGT

>multimic_7b

ATG---GCAAACAAGAAGTAGTACCTTGAAAAGATTCTTGTTTTAGGAGATTCAGGAGTTGGAAAAACTTCATTATTGCA

TCAATACGTCAACACAAAATTTACATTATCGCTTAAACCAACAATAGGAGCAGATTTTATGATAAAAGAATTGAAAATTG

ATGATAGAATGGTGACTTTATAAATATGGGATACAGCTGGCCAAGAAAGATTCAATTCTTTAAGCAAGGTATTGTATAGA

CATACTGATTGCTGTGTGTTAGTTTATGATATTACCAATCTAAAATCATTTGAGTCTTTAGAGTTATGGAGGAGTGAGTT

TTTAGATTAAGGATAACCAATGTATCCAGAAAAGTTCCCATTTGTGGTATTTGGAAACAAATTGGATAAGGCAAATGAGA

GATAAGTTTCATATGAAATT---GCATAATCCTGGTGCAAATTAAATGGAATCACATAATATTTTGAGGTTTCTGCTTAA

GATTCTACTAATCTTGAATAAGCCTTTTATGAAATTGCTGTGATATCAAACAGTCAAGAAAAATATGAACAAATTTTTCA

AGATTTTCCT----------TTGCTAGACAAACCGAAGAAAA---AAGATTATAATTCGAATGA--------CATATGT-

--TGT

>caudatum_7

ATG---TCAAGCAAGAAGAAATAGCTTTTTAAAATCATTATTCTAGGTGACTCAGGTGTGGGCAAAACATCTTTAATGAA

TCAATACGTCAATGCAAGATTCACACAATAATACAGAGCAACAGTGGGTGCAGATTTTATGGCAAAAGAAGTCATGATTG

ATGATAGAATGGTTACATTATAAATTTGGGATACTGCAGGATAAGAAAGATTCTAATCCTTAGGAGGTGCTTTTTACAGA

GGAGCTGATTGTTGTGTTCTTGTTTATGATTTGACAAATCCAAAATCATTTGACTCATTGGATTCTTGGAGAGATGAATT

TTTAATGCAAGGATAACCAAAAGATCCAGAACATTTTCCATTTATTGTTTTAGGAAATAAATTAGATAAAGCAAGTGAAA

GAAAGGTTCAAGAGGCAAAG---GCTCAATAATGGTGTAAATCTCATGGAAACATATAATTCTTTGAGGTTTCTGCTAAA

GATGCTACAAATATTGAGCAAGCCTTTTAGGATATTGCTAAAGCTGCTGCAAGCCAAGAAAAAGATGAAGAAATCTT---

---TTTCCCTACAA------CTGTGACTTTGACCAAGCAAGACAAAAAACCTTAAACAAAATAAGG------AGGATGC-

--TGT

>multimic_7a

ATG---TCAAGCAAGAAGAAATAACTTTTTAAAATCATCATTTTAGGAGATTCTGGAGTCGGTAAAACTTCTTTAATGAA

TTAATACGTCAATGCAAGGTTTACATAATAATATAGAGCAACAGTTGGAGCTGATTTCATGGCAAAAGAAGTCATGATTG

ATGATAGAATGGTGACATTATAAATCTGGGACACAGCAGGACAAGAAAGATTCTAATCATTGGGTGGTGCATTTTATAGA

GGAGCAGATTGCTGTGTGTTAGTTTATGATATAACAAATCCAAAATCATTTGATTCATTGGATTCATGGAGAGATGAATT

TTTGATGTAAGGATAACCAAAAGATCCAGAACATTTCCCATTTGTGGTATTGGGAAATAAATTGGATAAAGCAAGTGAAA

GAAAAGTTTAAGAAGCAAAA---GCACAATCTTGGTGCAAATCACATGGAAATATTTAATTCTTTGAAGTTTCTGCTAAA

GATGCAACTAATATTGAATAAGCATTTTAGGATATTGCAAAAGCTGCTGCTAGTCAAGAAAAAGATGAAGAAATATT---

---TTTCCCAACAA------CTGTGACATTAACCAAATAAGACCCTAAAAAATAAACAAAGCAATC------AGGATGC-

--TGT

>sexaurelia_7b

ATG---GCCAGCAAGAAGAAGCAACTTTTTAAAATCATCATCTTAGGGGATTCAGGTGTAGGTAAAACATCTTTGATGAA

TTAATATGTTAATGCAAGGTTCACATAATAATATAGAGCTACAGTTGGAGCAGATTTTATGGCAAAAGAAGTTATGATTG

ATGATCGTATGGTTACTCTTTAAATTTGGGACACTGCAGGTTAAGAAAGATTCCAATCTTTAGGAGGTGCATTTTATAGA

GGAGCTGATTGCTGTGTATTAGTTTATGACATTACAAATCCAAAATCATTTGATTCTTTGGATTCCTGGAGAGATGAATT

CTTAATGTAAGGTTAACCAAAGGATCCAGATCATTTTCCTTTTGTTGTATTAGGAAATAAATTGGATAAGGCTACAGAAA

GGAAAGTTCAAGAATCCAAA---GCTTAATAATGGTGTAAATCACATGGAAATATATAATTCTTTGAAGTTTCAGCTAAG

GATGCCACAAATATAGAATAAGCTTTCTAAGATATTGCAAAAGCTGCTGCAAGTTAGGAAAAAGATGAAGAAATATT---

---TTTCCCTACAA------CTGTTACATTAACAAAATAAAGCTAAAACCCATAAGCTAAATAAGG------AGGATGC-

--TGT

>decaurelia_7a1

ATG---GCTAGCAAGAAGAAATAACTTTTTAAAATCATCATCTTAGGTGATTCAGGAGTAGGAAAAACATCTATAATAAA

TTAATATGACAATATAAGGTTCACATAATAATACAGAACCACAATTGGAGTAGATTTTATAGCAAAAGAAGTTATGATTG

ATAATCATATGGTTCATCTTTAAATTTGGGACACTGCAGGTTAAGAGAGATTTTAATCACAAGATGGTGCATTTTATAGA

GGAGCTGATTGTTGCGTATTAGTTTACGATATCACTAATCCAAAATCATTTGATTCCTTAGATTCATGGAGAGATAAATT

TTTGATGTAAGGTTAACCAAAAGATCCAGAAAATTTTCCTTTTGTTGTATTAGGAAATAAATTGGATAAAGCCACAGAAA

GAAAAGTTGAGAAATCTAAA---GCTTAATAATGGTGTAAGTCTCATGGAAACATATAATTCTTTGAAGTATCAGCTAAA

GATGCCACAAATATTAAACAAGTTTTTCAAGACATTACAAAAGCTACTCCAAGTTAGGAAAAAGATTTAGAAATATT---

---TTTTCCAGAAA------CTGCGGCATTAGCTAAATGGAGCCAAAAACCATAAACCAAATAAGC------AGGAAGT-

--TGT

>quadecaurelia_7

ATG---GCCAGCAAGAAGAAACAACTTTTTAAAATTATCATTTTAGGTGATTCTGGAGTAGGAAAGACATCTTTAATGAA

TTAATATGTTAATGCAAGGTTTACATAATAATATAGAGCCACAGTCGGAGCAGATTTTATGGCAAAAGAAGTTATGATAG

ATGATCGTATGGTCACCCTTTAAATTTGGGATACAGCAGGTTAAGAGAGATTTCAATCATTAGGTGGTGCATTTTATAGA

GGAGCTGATTGTTGTGTATTAGTTTACGATATAACAAATCCAAAATCATTTGATTCTTTAGATTCTTGGAGAGATGAATT

TTTAATGTAGGGTTAACCAAAAGATCCAGAACATTTTCCTTTTGTCGTTTTAGGAAATAAATTGGATAAAGCAACAGAAA

GAAAGGTTTAAGAATCTAAA---AGTTAATAATGGTGTAAATCCCATGGAAATATATAATTCTTTGAAGTATCAGCAAAA

GATGCCACAAATATAGAATAAGCATTTCAAGACATTGCAAAAGCTGCAGCAAGTTAAGAGAAGGATGAAGAAATATT---

---TTTCCCTACAA------CAGTGACATTAACTAAATAAGATCCAAAGAAATAGACTAAATAAGG------AACATGT-

--TGT

>sexaurelia_7a

ATG---GCCAGCAAGAAGAAGCAACTTTTTAAAATTATCATATTAGGTGATTCAGGAGTAGGTAAAACATCTTTGATGAA

TTAATATGTCAATGCAAGGTTCACATAATAATATAGAGCTACGGTTGGAGCAGATTTTATGGCAAAAGAAGTTATGATTG

ATGATCGAATGGTCACACTTTAAATTTGGGACACAGCAGGCTAAGAAAGATTCTAATCATTAGGTGGCGCATTTTATAGA

GGGGCTGATTGTTGTGTATTGGTTTACGATATTACAAATCCAAAATCATTTGATTCTTTGGATTCTTGGAGAGATGAATT

TTTGATGTAAGGTTAACCAAAAGATCCAGAACATTTTCCTTTTGTAGTATTAGGCAATAAATTGGATAAAGCAACAGAAA

GAAAAGTTTAAGAATCTAAA---GCTTAATAATGGTGTAAATCACATGGAAATATACAATTCTTTGAAGTTTCTGCTAAA

GATGCCACCAATATTGAATAAGCTTTCTAAGACATTGCAAAAGCTGCAGCAAGCTAGGAAAAAGATGAAGAAATATT---

---TTTCCCTACCA------CTGTGACATTAACTAAATAGAGTTAAAAACCATAAGCAAAATAAGG------AGGATGC-

--TGT

>tetraurelia_7b

ATG---GCCAGCAAGAAGAAGCAACTTTTTAAAATCATCATCTTAGGTGATTCAGGAGTCGGAAAAACATCTTTGATGAA

TTAATATGTCAATGCAAGGTTCACTCAATAATATAGAGCTACAGTTGGTGCAGATTTTATGGCCAAGGAAGTTATGATAG

ATGATCGTATGGTTACCCTTTAAATTTGGGACACAGCAGGTTAAGAGAGATTCCAATCATTAGGTGGTGCATTTTACAGA

GGAGCTGATTGTTGTGTATTAGTATACGATATTACAAATCCAAAATCGTTTGATTCTTTGGATTCTTGGAGAGATGAATT

TCTAATGTAAGGTCAACCAAAAGATCCAGAACATTTTCCTTTTGTCGTCTTAGGAAATAAATTGGATAAAGCAACAGAAA

GAAAAGTTTAGGAATCCAAA---AGTTAATAATGGTGTAAATCACACGGAAATATACAATTTTTTGAAGTCTCAGCCAAA

GATGCCACAAATATAGAATAAGCTTTCCAAGACATTGCAAAAGCAGCTGCAAGTTAAGAAAAGGATGAAGAAATATT---

---TTTCCCTACAA------CTGTGACATTAACTAAATAAGACCCAAAGAAATAGACCAAACAAGG------AGGATGC-

--TGT

>octaurelia_7b

ATG---GCCAGCCAGAAGAAGCAACTTTTTAAAATCATCATCTTAGGTGATTCAGGAGTAGGAAAAACATCTTTGATGAA

TTAATATGTCAATGCAAGGTTCACTCAATAATATAGAGCTACAGTCGGTGCAGATTTTATGGCCAAGGAAGTTATGATAG

ATGATCGCATGGTTACCCTTTAAATTTGGGACACAGCAGGATAAGAGAGATTCCAATCATTAGGTGGTGCATTTTACAGA

GGAGCTGATTGTTGTGTATTGGTTTACGATATTACAAATCCAAAATCTTTTGATTCTTTGGATTCTTGGAGAGATGAATT

TTTAATGTAAGGTTAACCAAAAGATCCAGAACATTTTCCTTTTGTCGTTTTGGGAAATAAATTGGATAAAGCAACAGAAA

GAAAAGTTTAAGAATCCAAA---AGTTAATAATGGTGTAAATCACACGGAAATATACAATTTTTTGAAGTCTCAGCCAAA

GATGCCACAAATATAGAATAAGCTTTCCAAGACATTGCAAAAGCAGCTGCAAGTTAAGAAAAAGATGAAGAAATATT---

---TTTCCCTACAA------CTGTGACATTAACTAAATAAGACCCAAAGAAATAGACCAAATAAGG------AGGATGT-

--TGT

>septaurelia_7

ATG---GCCAGCAAGAAGAAGCAACTTTTTAAAATCATCATCTTAGGTGATTCAGGAGTAGGAAAAACATCTTTGATGAA

TTAATATGTCAATGCAAGGTTCACTCAATAATATAGAGCTACAGTCGGTGCAGATTTTATGGCCAAGGAAGTTATGATAG

ATGATCGCATGGTTACCCTTTAAATTTGGGACACAGCAGGATAAGAGAGATTCCAATCATTAGGTGGTGCATTTTACAGA

GGAGCTGATTGTTGTGTATTGGTTTACGATATTACAAATCCAAAATCTTTTGATTCTTTGGATTCTTGGAGAGATGAATT

TTTAATGTAAGGTTAACCAAAAGATCCAGAACATTTTCCTTTTGTCGTTTTGGGAAATAAATTGGATAAAGCAACAGAAA

GAAAAGTTTAAGAATCCAAA---AGTTAATAATGGTGTAAATCACACGGAAATATACAATTTTTTGAAGTCTCAGCCAAA

GATGCCACAAATATAGAATAAGCTTTCCAAGACATTGCAAAAGCAGCTGCAAGTTAAGAAAAAGATGAAGAAATATT---

---TTTCCCTACAA------CTGTGACATTAACTAAATAAGACCCAAAGAAATAGACCAAATAAGG------AGGATGC-

--TGT

>decaurelia_7b

ATG---GCCAGCAAGAAGAAGCAACTTTTTAAAATCATCATCTTAGGTGATTCAGGAGTAGGAAAAACATCTCTGATGAA

TTAATATGTCAATGCAAGGTTCACTCAATAATATAGAGCCACAGTTGGTGCAGATTTTATGGCCAAGGAAGTTATGATTG

ATGATCGCATGGTTACTCTTTAAATTTGGGACACAGCAGGTTAAGAGAGATTCCAATCATTAGGTGGTGCATTTTACAGA

GGAGCTGATTGTTGTGTCTTAGTTTACGATATTACAAATCCAAAATCATTTGATTCTTTGGATTCTTGGAGAGATGAATT

TTTAATGTAAGGTTAACCAAAAGATCCAGAACATTTTCCTTTTGTCGTTTTAGGAAATAAATTGGATAAAGCAACAGAAA

GAAAAGTTTAAGAATCCAAA---AGTTAATAATGGTGTAAATCACACGGAAATATACAATTTTTTGAAGTCTCAGCCAAA

GATAACACAAATATAGAATAAGCTTTCTAAGACATTGCAAAAGCAGCTGCAAGTTAAGAAAAAGATGAAGAAATATT---

---TTTCCCTACAA------CTGTGACATTAACTAAATAAGACCCAAAGAAATAGACCAAATAAGG------AGGATGC-

--TGT

>dodecaurelia_7b

ATG---GCCAGCAAGAAGAAGCAACTTTTTAAAATCATCATCTTAGGTGATTCAGGAGTAGGAAAAACATCTCTGATGAA

TTAATATGTCAATGCAAGGTTCACTCAATAATATAGAGCTACAGTTGGTGCAGATTTTATGGCCAAGGAAGTTATGATTG

ATGATCGCATGGTTACTCTTTAAATTTGGGACACAGCAGGTTAAGAGAGATTCCAATCATTAGGTGGTGCATTTTACAGA

GGAGCTGATTGTTGTGTATTAGTTTACGATATTACAAATCCAAAATCATTTGATTCTTTGGATTCTTGGAGAGATGAATT

TTTAATGTAAGGTTAACCAAAAGATCCAGAACATTTTCCTTTTGTCGTTTTAGGAAATAAATTGGATAAAGCAACAGAAA

GAAAAGTTTAAGAATCCAAA---AGTTAATAATGGTGTAAATCACACGGAAACATACAATTTTTTGAAGTCTCAGCCAAA

GATGCCACAAATATAGAATAGGCTTTCCAAGACATTGCAAAAGCAGCTGCAAGTTAAGAAAAAGATGAAGAAATATT---

---TTTCCCTACAA------CTGTGACATTAACTAAATAAGACCCAAAGAAATAGACCAAATAAGG------AGGATGC-

--TGT

>biaurelia_7b

ATG---GCCAGCAAGAAGAAGCAACTTTTTAAAATCATCATCTTAGGTGATTCAGGAGTAGGAAAAACTTCTTTGATGAA

TTAATATGTTAATGCAAGGTTCACACAATAATATAGAGCTACAGTTGGAGCAGATTTTATGGCAAAAGAAGTTATGATTG

ATGATCGCATGGTAACACTTTAAATTTGGGACACAGCAGGTTAAGAGAGATTCCAATCATTAGGTGGTGCATTTTATAGA

GGAGCTGATTGTTGTGTATTAGTTTACGACATCACAACTGCAAAATCATTTGATTCTTTGGATTCTTGGAGAGATGAATT

TTTGATGTAAGGTTAACCAAAAGATCCAGAACATTTTCCTTTTGTCGTTTTAGGAAATAAATTAGATAAAGCAGCAGAAA

GAAAAGTTTAAGAATCTAAA---AGTTAATAATGGTGTAAATCACATGGAAATATACAATTCTTTGAAGTATCAGCTAAA

GATGCCACAAATATAGAATAAGCTTTCTAAGACATTGCAAAGGCTGCTGCAAGTCAAGAAAAAGATGAAGAAATATT---

---TTTCCCTACAA------CTGTGACATTAACTAAATAAGACCCCAAGAAGTAGACGAAATAAGG------AGGATGT-

--TGT

>novaurelia_7b

ATG---GCAAGCAAGAAGAAACAACTTTTTAAAATCATTATCTTAGGTGATTCAGGAGTAGGAAAAACATCTTTAATGAA

TTAATATGTCAATGCGAGATTTACACAATAATATAGAGCTACAGTAGGAGCAGATTTTATGGCAAAAGAAGTTATGATTG

ATGATCGTATGGTAACACTTTAAATTTGGGATACAGCAGGTTAAGAGAGATTTTAATCATTAGGTGGTGCATTTTATAGA

GGAGCTGATTGTTGTGTATTAGTATATGATATTACAAATCCAAAATCATTTGATTCTTTGGATTCTTGGAGAGATGAATT

TTTAATGTAAGGTTAACCAAAAGATCCAGAACATTTTCCATTTGTCGTTTTAGGAAATAAATTGGATAAAGCAACAGAAA

GAAAAGTTTAAGAATCTAAA---AGTTAATAATGGTGTAAATCACATGGAAATATACAATTCTTTGAAGTATCAGCTAAA

GATGCTACAAATATAGAATAAGCTTTCTAAGATATTGCAAAAGCAGCTGCAAGTTAAGAAAAAGATGAAGAAATATT---

---TTTCCCTACAA------CTGTGACATTAACTAAATAAGATCCAAAGAAATAGACAAAATAAGG------AGGATGC-

--TGT

>primaurelia_7b

ATG---GCCAGCAAGAAGAAGCAACTTTTTAAAATTATCATCTTAGGTGATTCAGGAGTAGGTAAAACTTCTTTGATGAA

TTAATATGTTAATGCTAGGTTTACATAATAATATAGAGCAACAGTAGGAGCAGATTTTATGGCAAAAGAAGTTATGATTG

ATGATAGAATGGTAACACTTTAAATTTGGGATACAGCAGGTTAAGAGAGATTCCAATCATTAGGTGGTGCATTTTATAGA

GGAGCTGATTGTTGTGTATTAGTTTACGATATTACAAATCCAAAATCATTTGATTCTTTGGATTCTTGGAGAGATGAATT

TTTAATGTAAGGTTAACCAAAAGATCCAGAACATTTTCCTTTTGTCGTTTTAGGAAATAAATTGGATAAAGCAACAGAAA

GAAAAGTTTAAGAATCTAAA---AGTTAATAATGGTGTAAATCACATGGAAATATATAATTCTTTGAAGTATCAGCTAAA

GATGCAACTAATATAGAATAAGCTTTTTAAGACATAGCTAAAGCAGCTGCAAGTTAAGAAAAAGATGAAGAAATATT---

---TTTCCCTACAA------CTGTGACACTAACTAAATAAGACCCCAAGAAATAAGCAAAATAAGG------AGGATGC-

--TGT

>dodecaurelia_7a2

ATG---ATCAGCAATGAGAAGCAACTTTTCAAAATCATCATCTTAGGTGATTCAGGAGTAGGAAAAACATCTTTGATGAA

TTAATATGTCAATACAAGGTTCACATAATAATACAAAGCTACAATTGGGGCAGATTTTATGGCAAAAGAAGTTACGATTG

ATGATCGTACGGTTACTCTCTAAATTTGGGACACTGCAGGTTAAGAGAGATTTTAATCATTAAGTAGTGCATTTTATAGA

GGAGCTGATTGCTGTGTATTAGTTTGCGATATCACTAATCCAAAATCACTTGATTCCTTAGATTTATGGAGAGATGAATT

TTTGATATAAGGTTAACCAAAAGATTTAGAACATTTTCCTTTTGTTGTATTAGGAAATAAATTGGATAAAGCCACAGAAA

GAAAAGTTTAGGAATCTAAC---GCTTAATAATGGTGTAAGTCTCATGGAAACATATAATTCTTAGAAGTATCAGCTAAA

GATTCAATAAATATTGAACAAGCTTTTCAAGTCATTGCAAAAGCTGCTGCAAGTTATGAAAAAGATGTAGAAATATT---

---TTTCCCTACGC------CTGTAACATCAACTAAATAGGATCAAAAACCAGAAGCTGAATAGAGCCAAAAACAATTT-

--CAA

>jenningsi_7a3

ATG---TCCAGCAAAAAGAAGCAATTGTTTAAAATAATTATCTTAGGTGATTCAGGAGTAGGAAAAACATCGTTGATGAA

TTAATATGTTAATGCAAGATTCACATAATAATATAGAGCTACAGTTGGAGCAGATTTTATGGCAAAAGAAGTTATGATTG

ATGATCGTATGGTTACTCTATAAATTTGGGACACTGCAGGTTAAGAGAGATTCCAATCATTAGGTGGAGCATTTTATAGA

GGAGCTGATTGTTGTGTCTTAGTTTATGATATTACAAATCCAAAATCTTTTGATTCATTGGATTCTTGGAGAGATGAATT

TTTAATGTAAGGTTAACCAAAAGATCCAGAACATTTTCCTTTTGTTGTATTAGGAAATAAATTAGATAAAGCTACAGAAA

GAAAAGTTTAAGAATCTAAA---GCTTAATAATGGTGTAAATCACATGGAAATATTCAATTCTTTGAAGTCTCAGCTAAA

GATGCAACAAATATTGAATAAGCATTTCAAGATATTGCTAAAGCTGCTGCAAGCTAAGAAAAAGATGAAGAAATATT---

---TTTCCCTACAA------CTGTGACTTTAACTAAATAGAGCCAAAAACCATAAGCCAAATAAGG------AGGATGC-

--TGC

>jenningsi_7a4

ATG---TCCAGCAAAAAGAAGCAATTGTTTAAAATAATTATCTTAGGTGATTCAGGAGTAGGAAAAACATCGTTGATGAA

TTAATATGTTAATGCAAGATTCACATAATAATATAGAGCTACAGTTGGAGCAGATTTTATGGCAAAAGAAGTTATGATTG

ATGATCGTATGGTTACTCTATAAATTTGGGACACTGCAGGTTAAGAGAGATTCCAATCATTAGGTGGAGCATTTTATAGA

GGAGCTGATTGTTGTGTCTTAGTTTATGATATTACAAATCCAAAATCTTTTGATTCATTGGATTCTTGGAGAGATGAATT

TTTAATGTAAGGTTAACCAAAAGATCCAGAACATTTTCCTTTTGTTGTATTAGGAAATAAATTAGATAAAGCTACAGAAA

GAAAAGTTTAAGAATCTAAA---GCTTAATAATGGTGTAAATCACATGGAAATATTCAATTCTTTGAAGTCTCAGCTAAA

GATGCAACAAATATTGAATAAGCATTTCAAGATATTGCTAAAGCTGCTGCAAGCTAAGAAAAAGATGAAGAAATATT---

---TTTCCCTACAA------CTGTGACTTTAACTAAATAAGACCCAAAAAAGCAGAATAAATAGGG------AGTATGT-

--TGT

>jenningsi_7a1

ATG---GCCAGCAAGAAGAAGCAACTTTTTAAAATCATCATCTTAGGTGATTCAGGAGTCGGAAAAACATCTTTAATGAA

TTAATATGTTAATGCAAGGTTCACATAATAATATAGAGCTACAGTAGGAGCAGATTTTATGGCAAAAGAAGTTATGATAG

ATGATAGAATGGTAACTCTTTAAATTTGGGACACTGCAGGCTAAGAAAGATTTCAATCATTAGGTGGTGCATTTTATAGA

GGAGCTGATTGTTGTGTATTAGTTTACGATATTACAAATCCTAAATCATTTGATTCTTTGGATTCTTGGAGAGATGAATT

TTTGATGTAAGGTTAACCAAAAGATCCAGAACATTTTCCTTTTGTTGTATTAGGAAATAAATTAGATAAAGCTACAGAAA

GAAAAGTTTAAGAATCTAAA---GCATAATAATGGTGTAAATCACATGGAAATATATAATTCTTTGAAGTTTCAGCTAAA

GATGCAACAAATATTGAACAAGCTTTCTAAGATATTGCTAAAGCAGCTGCAAGCTAAGAAAAAGATGAAGAAATATT---

---TTTCCCTACAA------CTGTGACATTAACGAAATAGAGCCAAAAACCATAAACTAAATAAGG------AGGATGT-

--TGC

>jenningsi_7a2

ATG---GCCAGCAAGAAGAAGCAACTTTTTAAAATCATCATCTTAGGTGATTCAGGAGTCGGAAAAACATCTTTAATGAA

TTAATATGTTAATGCAAGGTTCACATAATAATATAGAGCTACAGTAGGAGCAGATTTTATGGCAAAAGAAGTTATGATAG

ATGATAGAATGGTAACTCTTTAAATTTGGGACACTGCAGGCTAAGAAAGATTTCAATCATTAGGTGGTGCATTTTATAGA

GGAGCTGATTGTTGTGTATTAGTTTACGATATTACAAATCCTAAATCATTTGATTCTTTGGATTCTTGGAGAGATGAATT

TTTGATGTAAGGTTAACCAAAAGATCCAGAACATTTTCCTTTTGTTGTATTAGGAAATAAATTAGATAAAGCTACAGAAA

GAAAAGTTTAAGAATCTAAA---GCATAATAATGGTGTAAATCACATGGAAATATATAATTCTTTGAAGTTTCAGCTAAA

GATGCAACAAATATTGAACAAGCTTTCTAAGATATTGCTAAAGCAGCTGCAAGCTAAGAAAAAGATGAAGAAATATT---

---TTTCCCTACAA------CTGTGACATTAACGAAATAAGACCCCAAGAAATAGACAAAATAGGG------TGGATGC-

--TGT

>octaurelia_7a1

ATG---GCCAGCCAGAAGAAGCAACTTTTTAAAATCATCATCTTGGGTGATTCAGGAGTAGGAAAAACATCTTTGATGAA

TTAATATGTCAATGCAAGGTTCACTTAATAATACAGAGCTACAGTCGGAGCAGATTTTATGGCCAAAGAAGTTATGATAG

ATGATCGCATGGTTACTCTTCAAATTTGGGACACTGCAGGCTAAGAGAGATTCCAATCATTAGGTGGAGCATTTTATAGA

GGAGCTGATTGTTGTGTATTAGTTTACGATATCACAAATCCAAAATCATTTGATTCATTGGATTCATGGAGAGATGAATT

TTTAATGTAAGGTTAACCAAAAGATCCAGAACATTTTCCTTTTGTTGTTTTAGGAAATAAATTAGATAAAGCCACAGAAA

GAAAAGTTTAGGAATCTAAA---GCTTAATAATGGTGTAAATCACATGGAAACATACAATTCTTTGAAGTATCAGCTAAA

GATGCCACAAATATTGAACAAGCCTTTCAAGACATTGCAAAAGCTGCAGCAAGTTAGGAAAAAGATGAAGAAATATT---

---TTTCCCTACAA------CTGTGACATTAACTAAATAGAGCCAAAAACCATAAGCCAAATAAGG------AGGATGT-

--TGT

>octaurelia_7a2

ATG---GCCAGCCAGAAGAAGCAACTTTTTAAAATCATCATCTTAGGTGATTCAGGAGTAGGAAAAACATCTTTGATGAA

TTAATATGTAAATGCAAGGTTCACTTAATAATACAGAGCTACAGTCGGAGCAGATTTTATGGCTAAAGAAGTTATGATAG

ATGATCGTATGGTTACCCTTCAAATCTGGGACACTGCAGGTTAAGAGAGATTCCAATCATTAGGTGGAGCATTTTATAGA

GGAGCTGATTGTTGTGTATTAGTTTACGATATCACAAATCCAAAATCATTTGATTCATTGGATTCATGGAGAGATGAATT

TTTAATGTAAGGTTAACCAAAAGATCCAGAACATTTTCCTTTTGTTGTTTTAGGAAATAAATTAGATAAAGCCACAGAAA

GAAAAGTTTAGGAATCTAAA---GCTTAATAATGGTGTAAATCACATGGAAACATACAATTCTTTGAAGTATCAGCTAAA

GATGCCACAAATATTGAACAAGCTTTTCAAGACATTGCAAAGGCTGCAGCAAGTTAGGAAAAAGATGAAGAAATATT---

---CTTCCCTACAA------CTGTGACATTAACTAAATAGAGCCAAAAACCATAAGCCAAATAAGG------AGGATGT-

--TGT

>tetraurelia_7a1

ATG---GCCAGCCAGAAGAAGCAACTTTTTAAAATCATCATCTTAGGTGATTCAGGAGTCGGAAAATCAGCTTTGATGGA

TTAATATGTCAATGCAAGGTTCACTTAATTATACAAAGCTTCAGTTGGAACAGATTTTATGGGCAAAAAAGTTATGATTG

ATGATCGTATGGTTACACTTTAACTTTGGGACACTGCAGGTTAAGAGAGATTCCAATCATTAGGTGGTGCATTTTATAGA

GGAGCTGATTGCTGCGTATTAGTTTATGATATCACAAATCCAAAATCATTTGATTCTTTGGATTCATAGAGAAATGAATT

TTTAATGTAAGGTTAACCAAAATATCCAGAACATTTTCCTTTTTTTGTATTAGGAAATAAATTAGATAAAGCCTCATAAA

GAAAGGTTTAGGAATCTAAA---GCTTAATAATGGTGTAAATCTCATGGAAACATATAATTCTTTGAAGTATCAGCTAAA

GATGCCACAAACATTGAACAAGCTTTTCAAGACATTGCAAAAGCTGCTGCAAGTTAGGAAAAAGATGAAGAAATATT---

---TTTCCCTACAA------CTGTGACATTAACTAAATAGAGCCAAAAACCATAAGCCAAATAAGG------AGGATGT-

--TGT

>decaurelia_7a2

ATG---GCTAGCAAGAAGAAACAACTTTTTAAAATCATCATCTTAGGTGATTCAGGAGTAGGAAAAACATCTTTGATGAA

TTAATATGTCAATGCAAGGTTCACATAATAATACAGAGCTACAGTTGGAGCAGATTTTATGGCAAAAGAAGTTATGATTG

ATGATCGTATGGTTACTCTTTAAATTTGGGACACTGCAGGTTAAGAGAGATTTTAATCATTGGGTGGTGCATTTTATAGA

GGAGCTGATTGCTGCGTATTAGTTTACGATATCACTAATCCAAAATCATTTGATTCCTTAGATTCATGGAGAGATGAATT

TTTAATGTAAGGATAACCAAAAGATCCAGAACATTTTCCTTTTGTTGTATTAGGAAATAAATTGGATAAAGCCACAGAAA

GAAAAGTTTAGGAATCTAAA---GCTTAATAATGGTGTAAGTCTCATGGAAACATATAATTTTTTGAAGTATCAGCTAAA

GATGCCACAAATATTGAACAAGCTTTTCAAGACATTGCAAAAGCTGCTGCAAGTTAGGAAAAAGATGAAGAAATATT---

---TTTCCCTACAA------CTGTGACATTAACTAAATAGAGTCAAAAACCATAAGCCAAATAAGG------AGGATGT-

--TGT

>dodecaurelia_7a1

ATG---GCTAGCAAGAAGAAACAGCTTTTTAAAATCATCATCTTAGGTGATTCAGGAGTAGGAAAAACATCTTTGATGAA

TTAATATGTCAATGCAAGGTTCACATAATAATACAGAGCTACAGTTGGGGCAGATTTTATGGCAAAAGAAGTTATGATTG

ATGATCGTATGGTTACTCTCTAAATTTGGGACACTGCAGGTTAAGAGAGATTTTAATCATTAGGTGGTGCATTTTATAGA

GGAGCTGATTGCTGTGTATTAGTTTACGATATCACTAATCCAAAATCATTTGATTCCTTAGATTCATGGAGAGATGAATT

TTTGATGTAAGGTTAACCAAAAGATCCAGAACATTTTCCTTTTGTTGTATTAGGAAATAAATTGGATAAAGCCACAGAAA

GAAAAGTTTAGGAATCTAAA---GCTTAATAATGGTGTAAGTCTCATGGAAACATATAATTCTTTGAAGTATCAGCTAAA

GATGCCACAAATATTGAACAAGCTTTTCAAGACATTGCAAAAGCTGCTGCAAGTTAGGAAAAAGATGAAGAAATATT---

---TTTCCCTACAA------CTGTGACATTAACTAAATAGAGCCAAAAACCATAAGCCAAATAAGG------AGGATGT-

--TGT

>tetraurelia_7a2

ATG---GCTAGCAAGAAGAAGCAACTTTTTAAAATCATCATCTTAGGTGATTCAGGAGTCGGAAAAACATCTTTGATGAA

TTAATATGTCAATGCAAGGTTCACTTAATAATACAGGGCTACAGTTGGAGCAGATTTTATGGCCAAAGAAGTTATGATTG

ATGATCGTATGGTTACACTTTAAATTTGGGACACTGCAGGTTAAGAGAGATTCCAATCATTAGGTGGTGCATTTTATAGA

GGAGCTGATTGCTGCGTATTAGTTTACGATATCACAAATCCAAAATCATTTGATTCATTGGATTCATGGAGAGATGAATT

TTTAATGTAAGGTTAACCAAAAGATCCAGAACATTTTCCTTTTGTTGTATTAGGAAATAAATTAGATAAAGCCTCAGAAA

GAAAAGTTTAGGAATCTAAA---GCTTAATAATGGTGTAAATCTCATGGAAACATATAATTCTTTGAAGTATCAGCTAAA

GATGCCACAAACATTGAACAAGCTTTTCAAGACATTGCAAAAGCTGCTGCAAGTTAGGAAAAAGATGAAGAAATATT---

---TTTCCCTACAA------CTGTGACATTAACTAAATAGAGCCAAAAACCATAAGCCAAATAAGG------AGGATGT-

--TGT

>biaurelia_7a1

ATG---GCCAGCAAGAAGAAATAACTTTTTAAAATCATTATCTTAGGTGATTCAGGAGTAGGAAAAACATCTTTAATGAA

TTAATATGTTAATGCAAGATTCACATAATAATATAGAGCTACAGTAGGAGCAGATTTTATGGCAAAAGAAGTTATGATTG

ATGATCGCATGGTTACTCTTTAAATTTGGGATACTGCAGGATAAGAAAGATTCTAATCATTAGGTGGTGCATTTTATAGA

GGAGCTGATTGTTGTGTATTAGTTTACGATATCACAAATCCAAAATCATTTGATTCCTTAGATTCTTGGAGAGATGAATT

TTTAATGTAAGGTTAACCAAAAGATCCAGAACATTTCCCTTTTGTTGTATTGGG-AATAAATTGGATAAAGCTACAGAA-

-GAAAGTTTAAGAATCTAAA---GCATAATAATGGTGTAAATCTCATGGAAATATATAATTCTTTGAAGTATCTGCTAAA

GATGCAACTAATATTGAATAAGCATTTTAAGACATTGCAAAAGCTGCTGCAAGTTAGGAAAAAGATGAAGAAATATT---

---TTTCCCTACAA------CTGTGACATTAACTAAATAGAGTTAAAAACCATAAGCTAAATAAGG------AGGATGC-

--TGT

>biaurelia_7a2

ATG---GCCAGCAAGAAGAAACAACTTTTTAAAATCATTATCTTAGGTGATTCAGGAGTAGGAAAAACATCTTTAATGAA

TTAATATGTTAATGCAAGATTCACATAATAATATAGAGCTACAGTAGGAGCAGATTTTATGGCAAAAGAAGTTATGATTG

ATGATCGCATGGTTACTCTTTAAATTTGGGATACTGCAGGATAAGAAAGATTCTAATCATTAGGTGGTGCATTTTATAGA

GGAGCTGATTGTTGTGTATTAGTTTACGATATCACAAATCCAAAATCATTTGATTCCTTAGATTCTTGGAGAGATGAATT

TTTAATGTAAGGTTAACCAAAAGATCCAGAACATTTCCCTTTTGTTGTATTGGGAAATAAATTGGATAAAGCTACAGAAA

GAAAAGTTTAAGAATCTAAA---GCATAATAATGGTGTAAATCTCATGGAAATATATAATTCTTTGAAGTATCTGCTAAA

GATGCAACTAATATTGAATAAGCATTTTAAGACATTGCAAAAGCTGCTGCAAGTTAGGAAAAAGATGAAGAAATATT---

---TTTCCCTACAA------CTGTGACATTAACTAAATAGAGTTAAAAACCATAAGCTAAATAAGG------AGGATGC-

--TGT

>primaurelia_7a

ATG---GCCAGCAAGAAGAAGCAACTTTTTAAAATTATCATTTTAGGTGATTCAGGAGTAGGAAAAACATCTTTAATGAA

TTAATATGTTAATGCAAGGTTCACATAATAATATAGAGCTACAGTTGGAGCAGATTTTATGGCAAAAGAAGTTATGATTG

ATGATCGTATGGTTACTCTTTAAATTTGGGACACTGCAGGTTAAGAAAGATTCTAATCATTAGGTGGTGCATTTTATAGA

GGAGCTGATTGTTGTGTATTAGTTTATGATATTACAAATCCAAAATCATTTGATTCATTGGATTCTTGGAGAGATGAATT

TTTAATGTAAGGTTAACCAAAAGATCCAGAACATTTTCCTTTTGTTGTATTAGGAAATAAATTAGATAAAGCTACAGAAA

GAAAAGTTTAAGAATCTAAA---GCATAATAATGGTGTAAATCTCATGGAAATATATAATTCTTTGAAGTATCAGCTAAA

GATGCCACAAATATTGAATAAGCCTTTTAAGACATTGCAAAAGCAGCTGCAAGCTAGGAAAAAGATGAAGAAATATT---

---TTTCCCTACAA------CTGTGACATTAACTAAATAGGACCCCAAGAAATAGCAAAAATAAGG------AGGATGT-

--TGT

>novaurelia_7a1

ATG---GCCAGCAAGAAGAAGCAACTTTTTAAAATCATTATCTTAGGTGATTCAGGAGTAGGAAAAACATCTTTAATGAA

TTAATATGTCAATGCAAGATTCACATAATAATATAGAGCTACAGTTGGAGCAGATTTTATGGCAAAAGAAGTTATGATAG

ATGATCGTATGGTTACTCTTTAAATTTGGGACACTGCAGGTTAAGAGAGATTCTAATCATTAGGTGGTGCATTTTATAGA

GGAGCTGATTGTTGTGTATTAGTTTACGATATCACAAATCCAAAATCATTTGATTCCTTGGATTCTTGGAGAGATGAATT

TTTAATGTAAGGTTAACCAAAAGATCCAGAACATTTTCCTTTTGTTGTATTAGGAAATAAATTGGATAAAGCAACAGAAA

GAAAAGTTTAAGAATCTAAA---GCTTAATAATGGTGTAAATCTCATGGAAACATATAATTCTTTGAAGTATCAGCTAAA

GATGCCACAAATATTGAATAAGCTTTTCAAGACATTGCAAAAGCAGCTGCAAGCTAGGAAAAAGATGAAGAAATATT---

---TTTCCCTACAA------CTGTGACATTAACTAAATAGGACCCCAAGAAATAGGCAAAATAAGG------AGGATGT-

--TGT

>novaurelia_7a2

ATG---GCCAGCAAGAAGAAGCAACTTTTTAAAATCATTATCTTAGGTGATTCAGGAGTAGGAAAAACATCTTTAATGAA

TTAATATGTCAATGCAAGATTCACATAATAATATAGAGCTACAGTTGGAGCAGATTTTATGGCAAAAGAAGTTATGATAG

ATGATCGTATGGTTACTCTTTAAATTTGGGACACTGCAGGTTAAGAGAGATTCTAATCATTAGGTGGTGCATTTTATAGA

GGAGCTGATTGTTGTGTATTAGTTTACGATATCACAAATCCAAAATCATTTGATTCCTTGGATTCTTGGAGAGATGAATT

TTTAATGTAAGGTTAACCAAAAGATCCAGAACATTTTCCTTTTGTTGTATTAGGAAATAAATTGGATAAAGCAACAGAAA

GAAAAGTTTAAGAATCTAAA---GCTTAATAATGGTGTAAATCTCATGGAAACATATAATTCTTTGAAGTATCAGCTAAA

GATGCCACAAATATTGAATAAGCTTTTCAAGACATTGCAAAAGCAGCTGCAAGCTAGGAAAAAGATGAAGAAATATT---

---TTTCCCTACAA------CTGTGACATTAACTAAATAGAACCAAAAACCATAAGCTAAATAAGG------AGGATGC-

--TGT

**Figure S2.** The full alignment of all sequences used to make the phylogeny in Figure 1 and detailed in Table S1. Text files of all alignments suitable for analysis by phylogenetics programs are available upon request.
